# Supplementary material for: Opportunistic CT for Prediction of Adverse Postoperative Events in Patients with Spinal Metastases
Source: MDPI journal article supplement (doi:10.3390/diagnostics14080844), 2024-04-19
Supplement: s1 [file s1]

**Supplementary Table S1.** Bivariate linear regression for hospitalization, and bivariate logistic regression for postoperative complications within 30 days, and reoperations in spinal metastases undergoing surgery (n=196)

| Variables                                                   | Length of stay       |                |                 | Postoperative complications (30 days) |                |                 | Reoperation         |                |             |
|-------------------------------------------------------------|----------------------|----------------|-----------------|---------------------------------------|----------------|-----------------|---------------------|----------------|-------------|
|                                                             | Coefficient (95% CI) | Standard error | p-value         | Odds ratio (95% CI)                   | Standard error | p-value         | Odds ratio (95% CI) | Standard error | p-value     |
| Age (years)                                                 | -0.02 (-0.10; 0.6)   | 0.041          | 0.70            | 0.99 (0.97; 1.03)                     | 0.013          | 0.93            | 0.97 (0.94; 1.01)   | 0.016          | 0.06        |
| Body mass index (in kg/m <sup>2</sup> )                     | -0.12 (-0.31; 0.06)  | 0.093          | 0.19            | 0.93 (0.87; 0.99)                     | 0.031          | <b>0.03</b>     | 0.99 (0.93; 1.08)   | 0.038          | 0.99        |
| Duration primary diagnosis till metastatic operation (days) | -0.01 (-0.01; 0.01)  | 0.001          | 0.15            | 0.99 (0.99; 1.01)                     | 0.001          | 0.81            | 0.99 (0.99; 1.01)   | 0.001          | 0.20        |
| Albumin (g/dL)                                              | -2.57 (-4.08; -1.06) | 0.765          | <b>&lt;0.01</b> | 0.38 (0.22; 0.65)                     | 0.105          | <b>&lt;0.01</b> | 1.58 (0.80; 3.12)   | 0.548          | 0.19        |
| Male                                                        | 0.64 (-1.26; 2.55)   | 0.965          | 0.51            | 0.97 (0.52; 1.81)                     | 0.310          | 0.93            | 0.93 (0.42; 2.04)   | 0.374          | 0.85        |
| Additional Modified Charlson comorbidity                    | 2.04 (0.13; 3.95)    | 0.967          | <b>0.04</b>     | 1.45 (0.76; 2.78)                     | 0.482          | 0.26            | 0.61 (0.28; 1.32)   | 0.241          | 0.21        |
| Primary tumor growth                                        |                      |                |                 |                                       |                |                 |                     |                |             |
| Slow                                                        | 0.03 (-2.32; 2.38)   | 1.193          | 0.98            | 0.76 (0.36; 1.73)                     | 0.316          | 0.55            | 0.58 (0.21; 1.60)   | 0.301          | 0.29        |
| Moderate                                                    | 0.55 (-1.58; 2.68)   | 1.082          | 0.61            | 1.03 (0.52; 2.06)                     | 0.365          | 0.92            | 0.63 (0.26; 1.54)   | 0.286          | 0.31        |
| Rapid                                                       | <i>Ref</i>           |                |                 | <i>Ref</i>                            |                |                 | <i>Ref</i>          |                |             |
| Additional metastases                                       | 0.50 (-1.52; 2.52)   | 1.023          | 0.63            | 1.62 (0.81; 3.26)                     | 0.577          | 0.17            | 0.52 (0.24; 1.15)   | 0.210          | 0.11        |
| Spinal pain                                                 | 2.47 (-5.26; 0.32)   | 1.414          | 0.08            | 0.89 (0.36; 2.21)                     | 0.413          | 0.80            | 0.68 (0.23; 1.97)   | 0.369          | 0.47        |
| ASIA impairment scale (preoperative)                        |                      |                |                 |                                       |                |                 |                     |                |             |
| Neurological deficit (A, B, C, or D)                        | <i>Ref</i>           |                |                 | <i>Ref</i>                            |                |                 | <i>Ref</i>          |                |             |
| No neurological deficit (E)                                 | -0.77 (-2.63; 1.09)  | 0.944          | 0.48            | 0.54 (0.29; 0.99)                     | 0.169          | <b>0.049</b>    | 0.84 (0.38; 1.82)   | 0.331          | 0.65        |
| Metastases region                                           |                      |                |                 |                                       |                |                 |                     |                |             |
| Thoracic                                                    | <i>Ref</i>           |                |                 | <i>Ref</i>                            |                |                 | <i>Ref</i>          |                |             |
| Lumbar                                                      | -0.62 (-2.78; 1.55)  | 1.098          | 0.57            | 0.85 (0.42; 1.69)                     | 0.099          | 0.64            | 0.90 (0.36; 2.42)   | 0.419          | 0.82        |
| Cervical                                                    | 1.22 (-3.97; 1.53)   | 1.395          | 0.38            | 0.13 (0.03; 0.58)                     | 0.298          | <b>0.01</b>     | 1.41 (0.50; 4.00)   | 0.750          | 0.52        |
| Combined                                                    | 1.04 (-5.54; 3.45)   | 2.278          | 0.65            | 0.48 (0.10; 2.44)                     | 0.400          | 0.38            | <i>No Value</i>     |                |             |
| Previous local radiotherapy                                 | 0.75 (-1.21; 2.71)   | 0.995          | 0.45            | 1.54 (0.82; 2.90)                     | 0.497          | 0.18            | 1.89 (0.87; 4.14)   | 0.755          | 0.11        |
| Previous systemic therapy                                   | -1.27 (-3.12; 0.57)  | 0.934          | 0.17            | 1.75 (0.94; 3.25)                     | 0.554          | 0.08            | 1.39 (0.63; 3.04)   | 0.555          | 0.42        |
| Pathological fracture                                       | 0.77 (-1.07; 2.62)   | 0.936          | 0.41            | 1.34 (0.73; 2.47)                     | 0.417          | 0.35            | 1.21 (0.56; 2.63)   | 0.480          | 0.63        |
| Number of spine levels undergoing operation                 |                      |                |                 |                                       |                |                 |                     |                |             |
| 1                                                           | <i>Ref</i>           |                |                 | <i>Ref</i>                            |                |                 | <i>Ref</i>          |                |             |
| 2                                                           | -0.93 (-3.51; 1.65)  | 0.936          | 0.48            | 1.73 (0.73; 4.05)                     | 0.751          | 0.21            | 0.90 (0.32; 2.49)   | 0.468          | 0.84        |
| 3 or more                                                   | -3.25 (-5.24; -1.27) | 1.006          | <b>&lt;0.01</b> | 1.56 (0.80; 3.06)                     | 0.537          | 0.19            | 0.36 (0.14; 0.95)   | 0.179          | <b>0.04</b> |
| Type of surgery                                             |                      |                |                 |                                       |                |                 |                     |                |             |
| Vertebrectomy or corpectomy with stabilization              | <i>Ref</i>           |                |                 | <i>Ref</i>                            |                |                 | <i>Ref</i>          |                |             |
| Decompression and stabilization                             | -0.39 (-2.47; 1.70)  | 1.059          | 0.72            | 0.55 (0.27; 1.12)                     | 0.199          | 0.10            | 0.85 (0.35; 2.03)   | 0.377          | 0.71        |

|                                                                                                                                                                                                      |                     |       |             |                    |       |             |                    |       |      |
|------------------------------------------------------------------------------------------------------------------------------------------------------------------------------------------------------|---------------------|-------|-------------|--------------------|-------|-------------|--------------------|-------|------|
| Decompression                                                                                                                                                                                        | -0.68 (-3.53; 2.18) | 1.447 | 0.64        | 0.85 (0.34; 2.12)  | 0.396 | 0.72        | 1.36 (0.46; 4.02)  | 0.752 | 0.57 |
| Stabilization                                                                                                                                                                                        | -0.46 (-4.22; 3.30) | 1.907 | 0.81        | 1.34 (0.42; 4.25)  | 0.789 | 0.62        | 0.38 (0.05; 3.20)  | 0.416 | 0.38 |
| Surgical approach                                                                                                                                                                                    |                     |       |             |                    |       |             |                    |       |      |
| Posterior                                                                                                                                                                                            | <i>Ref</i>          |       |             | <i>Ref</i>         |       |             | <i>Ref</i>         |       |      |
| Anterior                                                                                                                                                                                             | -0.60 (-3.48; 2.28) | 1.460 | 0.68        | 1.08 (0.42; 2.81)  | 0.526 | 0.88        | 1.22 (0.38; 3.90)  | 0.724 | 0.74 |
| Combined                                                                                                                                                                                             | 7.56 (1.82-13.35)   | 2.923 | <b>0.01</b> | 3.47 (0.56; 21.40) | 3.221 | 0.18        | 1.38 (0.15; 12.80) | 1.565 | 0.78 |
| <b>Body composition measurements<sup>a</sup></b>                                                                                                                                                     |                     |       |             |                    |       |             |                    |       |      |
| Subcutaneous adipose tissue                                                                                                                                                                          |                     |       |             |                    |       |             |                    |       |      |
| Area (cm <sup>2</sup> )                                                                                                                                                                              | -0.01 (-0.01; 0.01) | 0.004 | 0.99        | 0.99 (0.99; 1.01)  | 0.002 | 0.06        | 0.99 (0.99; 1.01)  | 0.002 | 0.61 |
| Visceral adipose tissue                                                                                                                                                                              |                     |       |             |                    |       |             |                    |       |      |
| Area (cm <sup>2</sup> )                                                                                                                                                                              | 0.01 (-0.01; 0.02)  | 0.005 | 0.47        | 0.99 (0.99; 1.01)  | 0.002 | 0.13        | 0.99 (0.99; 1.01)  | 0.002 | 0.23 |
| Muscle                                                                                                                                                                                               |                     |       |             |                    |       |             |                    |       |      |
| Area (cm <sup>2</sup> )                                                                                                                                                                              | -0.01 (-0.03; 0.03) | 0.029 | 0.85        | 0.99 (0.98; 0.99)  | 0.006 | <b>0.03</b> | 0.99 (0.98; 1.01)  | 0.007 | 0.36 |
| <i>CI=confidence interval; kg/m<sup>2</sup>=kilogram per square meter; g/dL=gram per deciliter; ASIA=American Spinal Injury Association; cm<sup>2</sup>=square centimeters; Ref=reference value.</i> |                     |       |             |                    |       |             |                    |       |      |
| <b>Bold p-values are &lt;0.05.</b>                                                                                                                                                                   |                     |       |             |                    |       |             |                    |       |      |
